# Supplementary material for: Molecular determinants of phospholipid treatment to reduce intracellular cholesterol accumulation in NPC1 deficiency
Source: PubMed Central journal article supplement — J Biol Chem. 2024 Oct 11;300(11):107889. doi: 10.1016/j.jbc.2024.107889 (PMC11650715; doi:10.1016/j.jbc.2024.107889), 2024-10-11

## SUPPORTING INFORMATION

For

### **Molecular determinants of phospholipid treatment to reduce intracellular cholesterol accumulation in NPC1 deficiency**

Shikun Deng<sup>a,#</sup>, Ting-Ann Liu<sup>a,#</sup>, Olga Ilnytska<sup>a,b</sup>, Tamara Allada<sup>a</sup>, Angelina Fomina<sup>a</sup>, Nancy Lin<sup>a</sup>,  
Valentina Z. Petukhova<sup>c</sup>, Kolege C. Pathmasiri<sup>c</sup>, Kiran Chinthapally<sup>d</sup>, Brian S. J. Blagg<sup>d</sup>, Brandon L.  
Ashfeld<sup>d</sup>, Stephanie M. Cologna<sup>c</sup>, and Judith Storch<sup>a,b</sup>

<sup>a</sup> Department of Nutritional Sciences, Rutgers University, New Brunswick, NJ 08901, USA

<sup>b</sup> Rutgers Center for Lipid Research, Rutgers University, New Brunswick NJ 08901, USA

<sup>c</sup> Department of Chemistry, University of Illinois Chicago, Chicago, IL 60607, USA

<sup>d</sup> Warren Center for Drug Discovery and Development, Department of Chemistry and Biochemistry,  
University of Notre Dame, Notre Dame, IN 46556, USA

<sup>1</sup>H and <sup>13</sup>C NMR Spectra

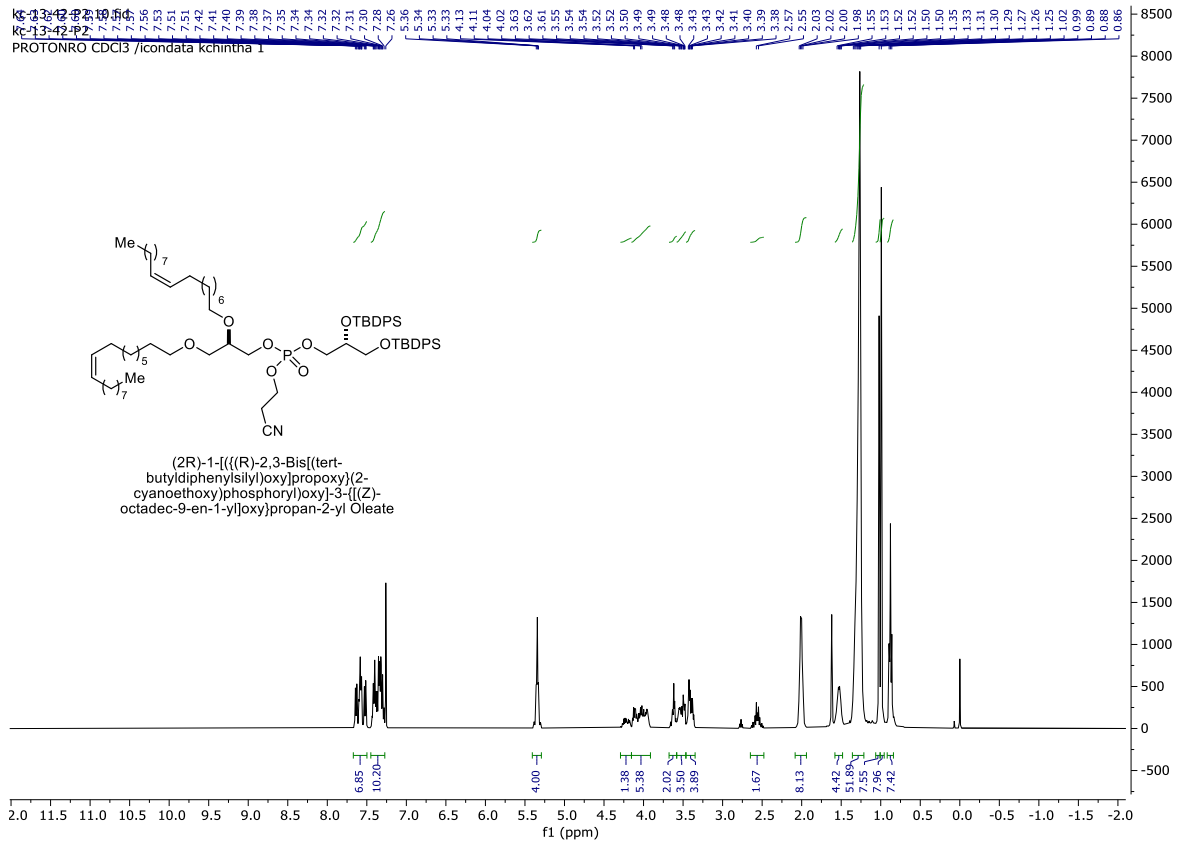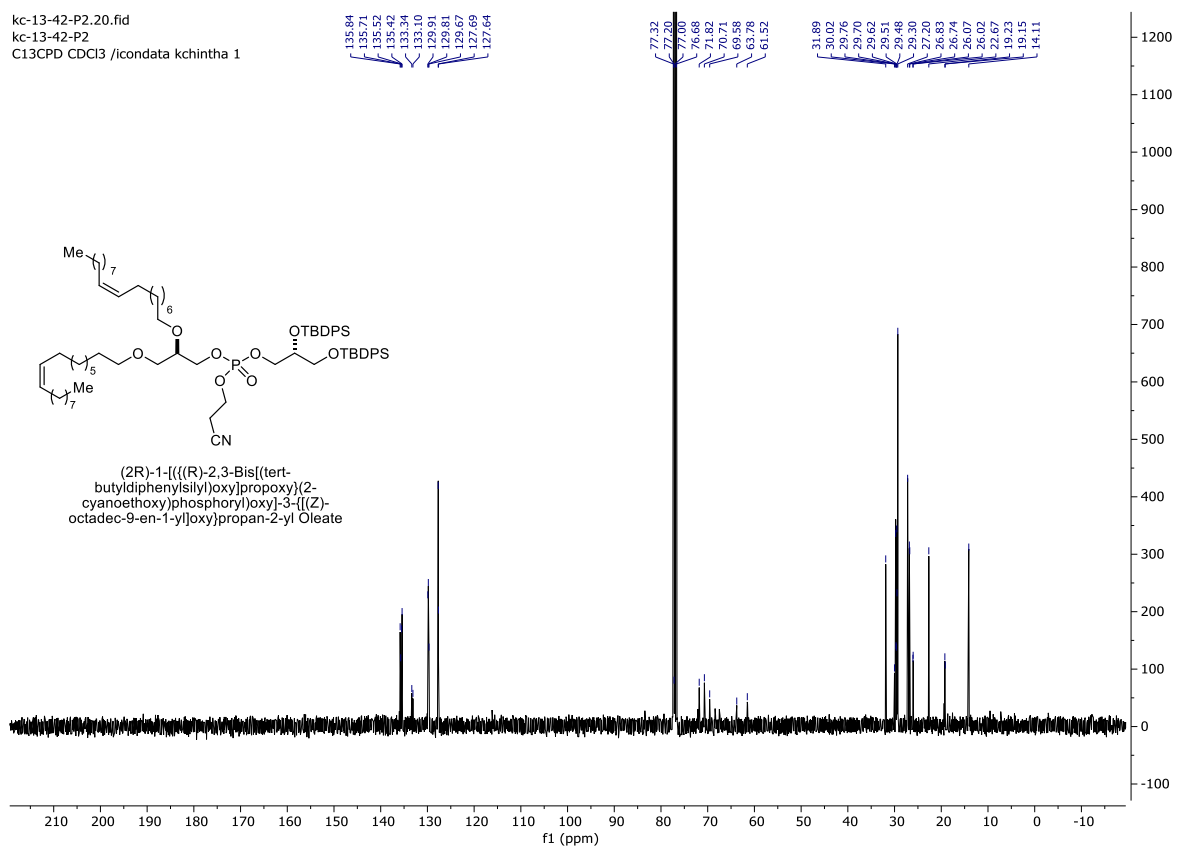

kc-13-42-P2.11.fid  
 kc-13-42-P2  
 P31CPD CDCI3 /icondata kchintha 1

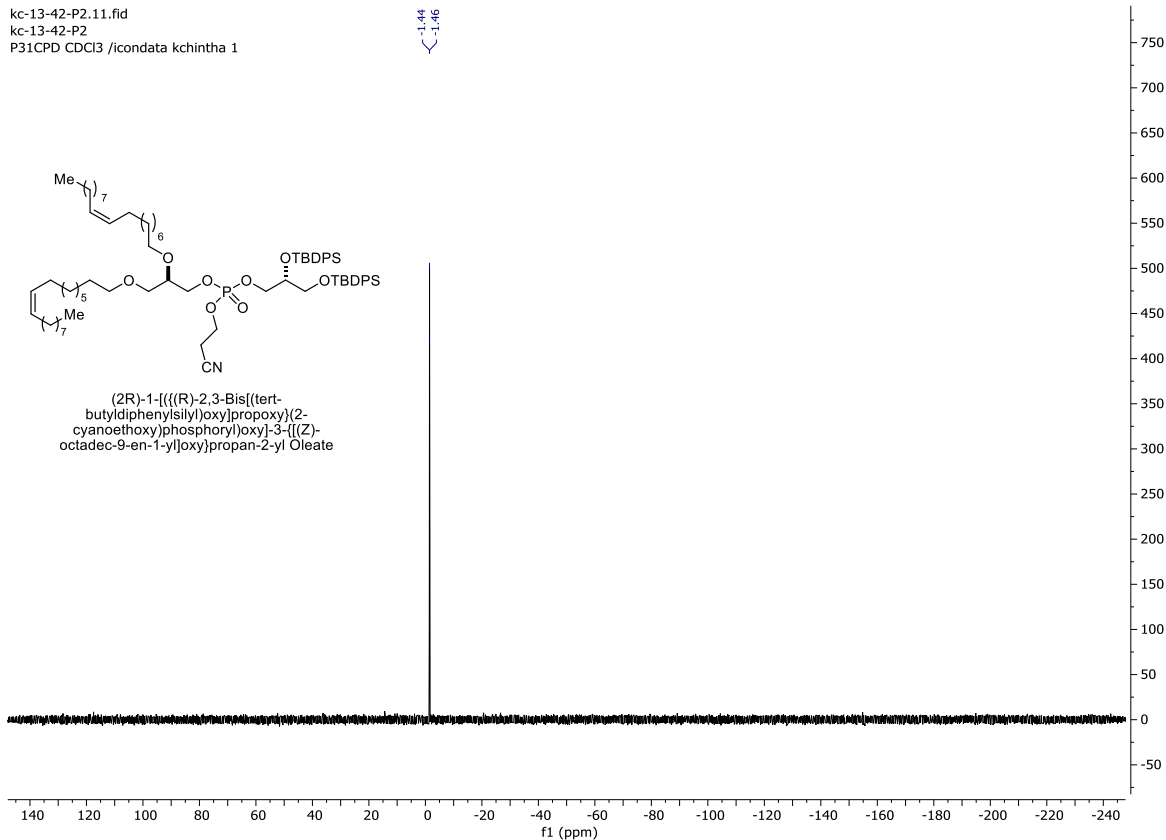

kc-13-45.11.fid  
 kc-13-45  
 PROTONRO CDCI3 /icondata kchintha 21

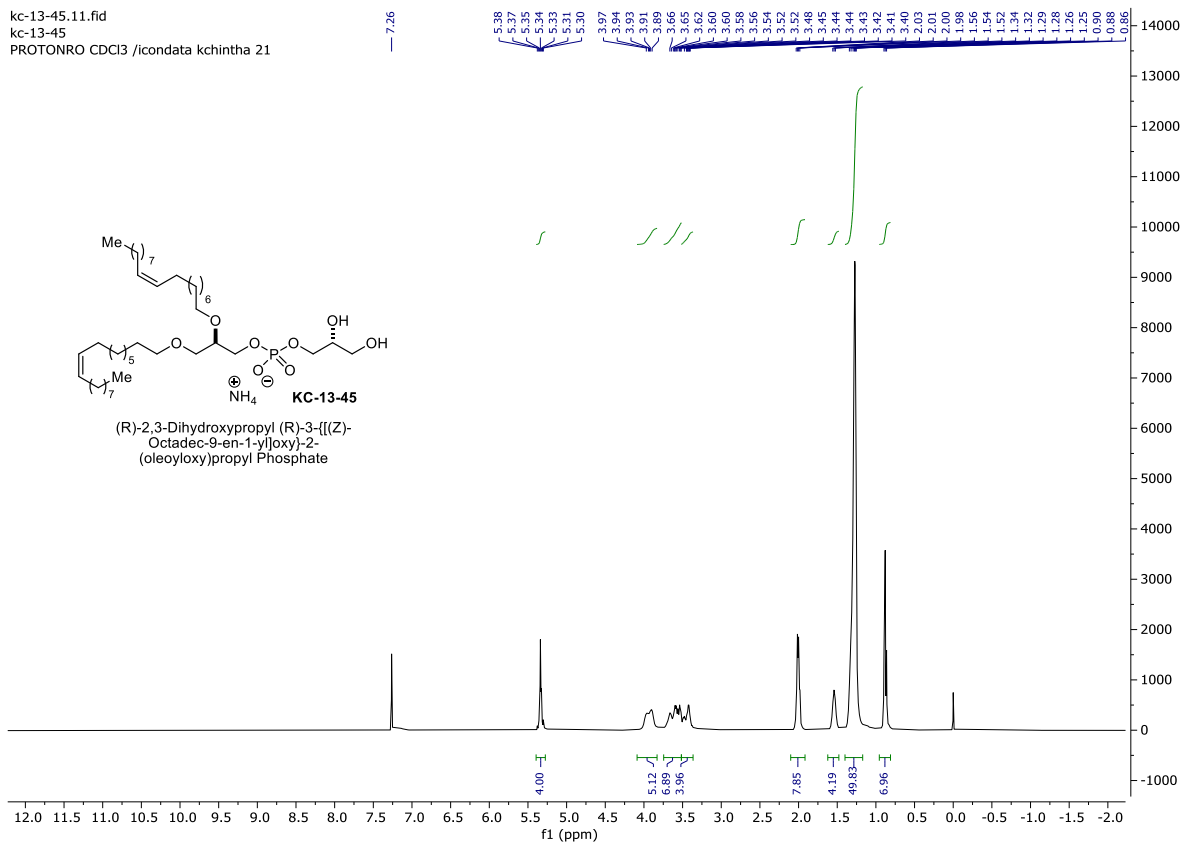

kc-13-45.10.fid  
kc-13-45  
C13CPD CDCl3 /icondata kchintha 21

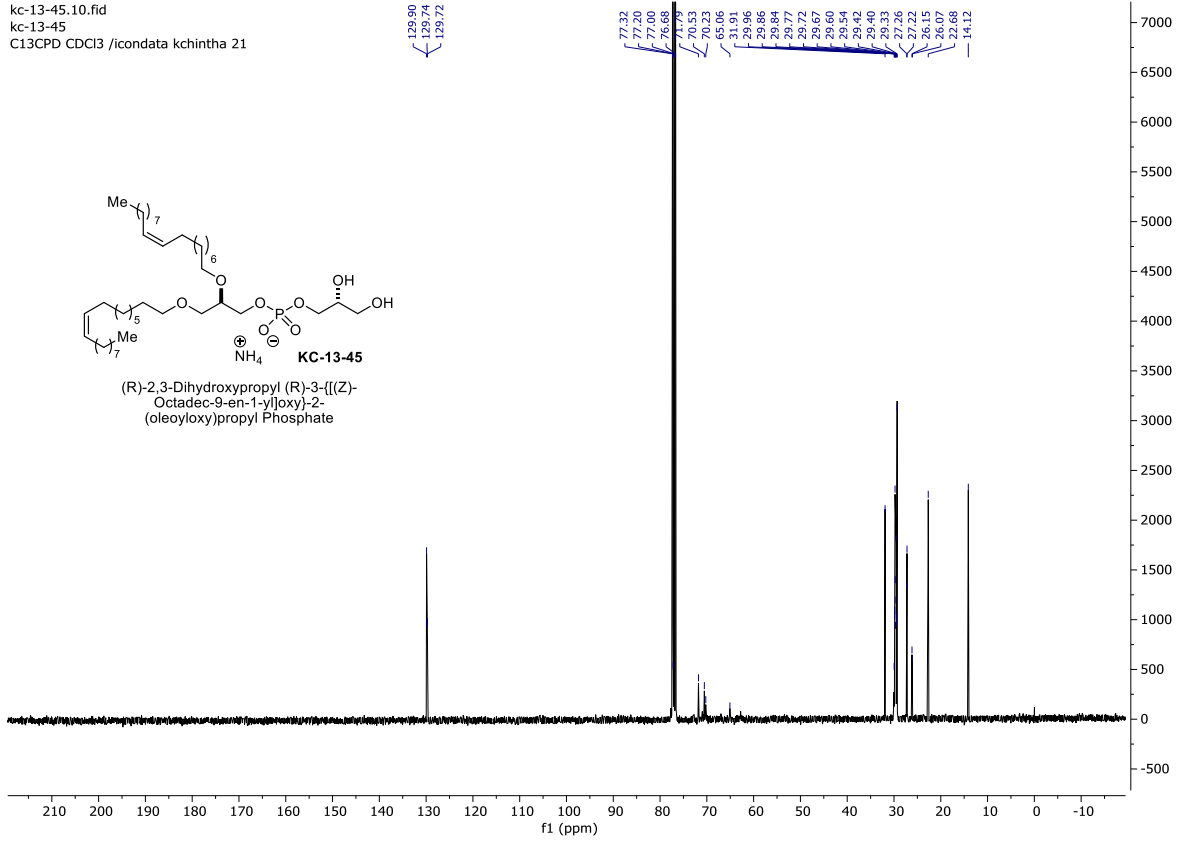

kc-13-45.20.fid  
kc-13-45  
P31CPD CDCl3 /icondata kchintha 21

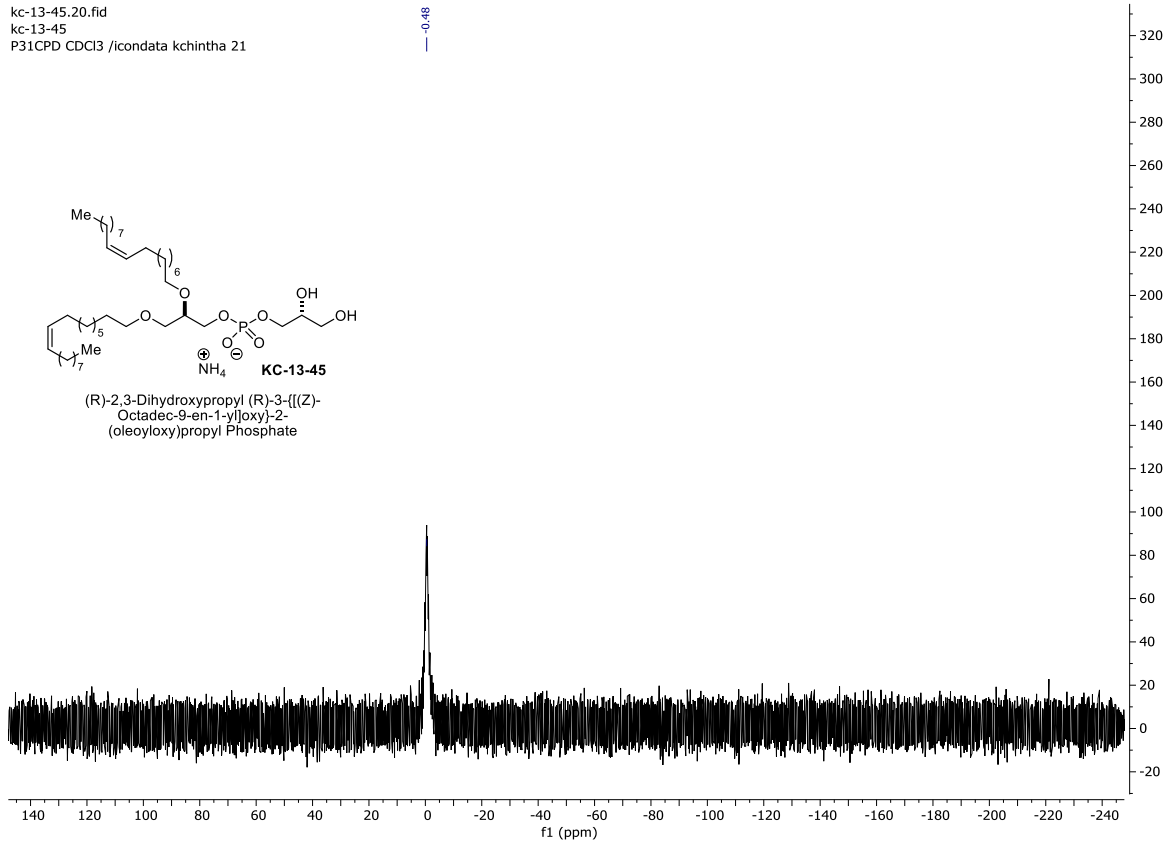

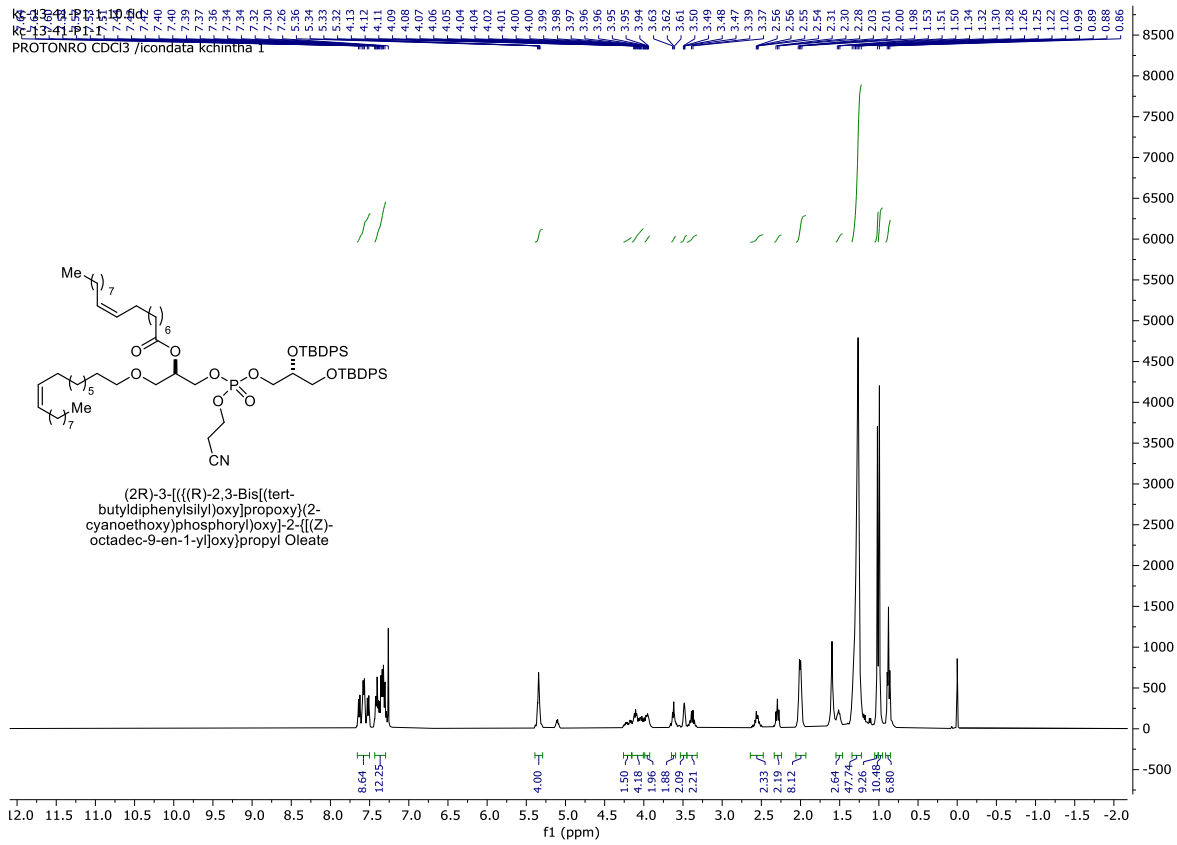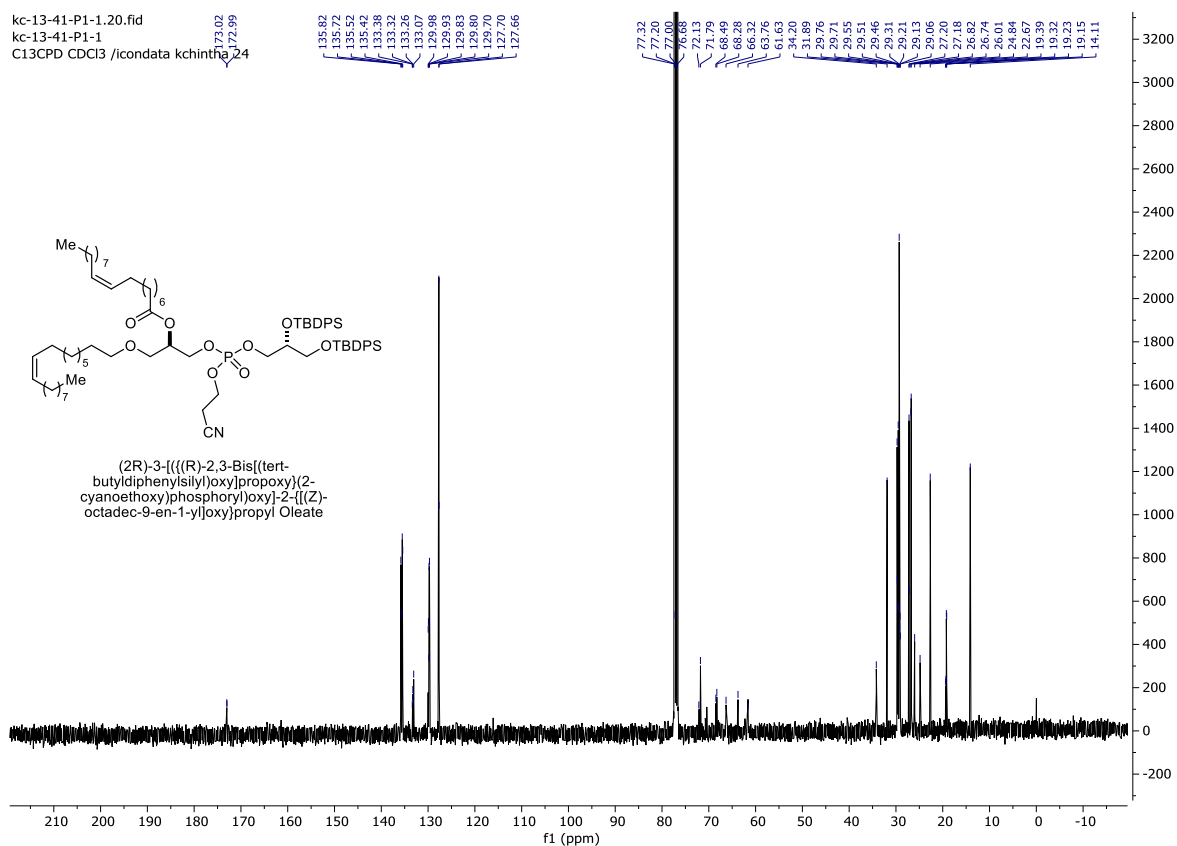

kc-13-41-P1-1.31.fid  
 kc-13-41-P1-1  
 P31CPD CDCI3 /icondata kchintha 1

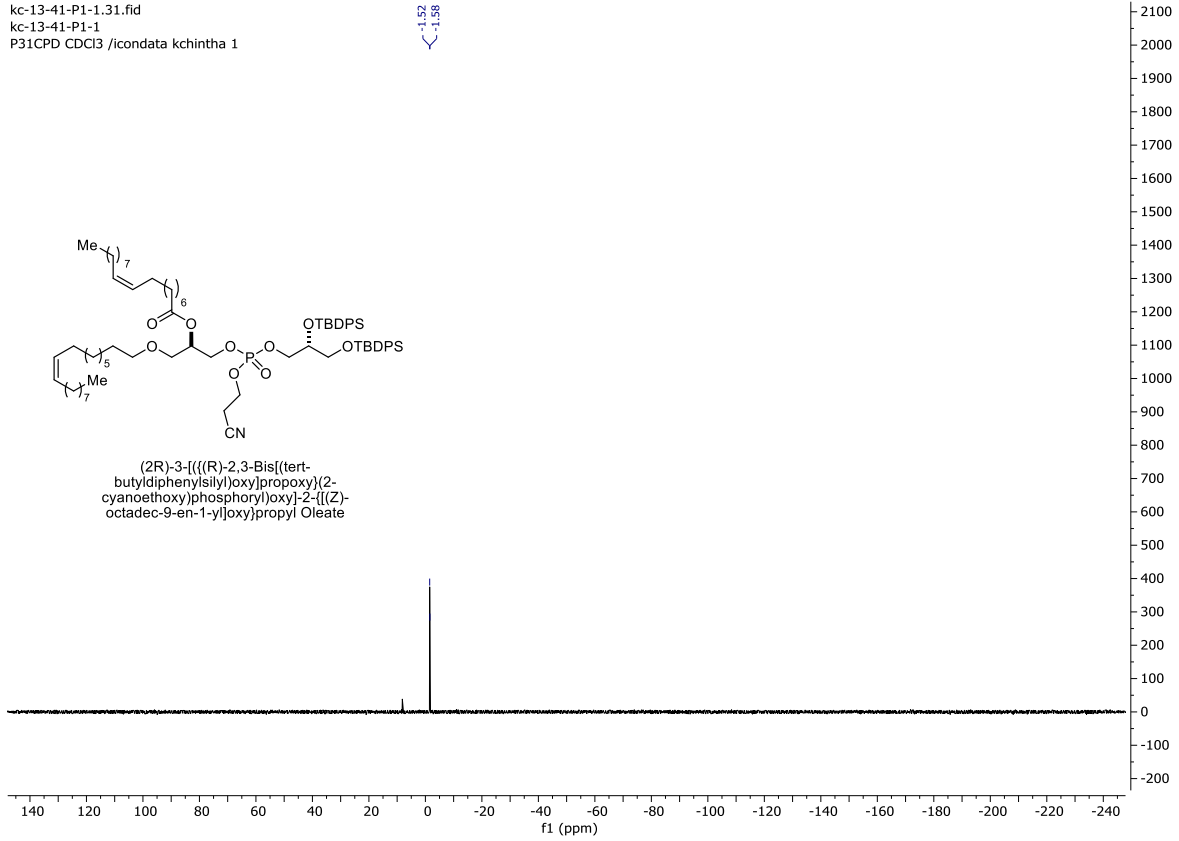

kc-13-46.10.fid  
 kc-13-46  
 PROTONRO CDCI3 /icondata kchintha 21

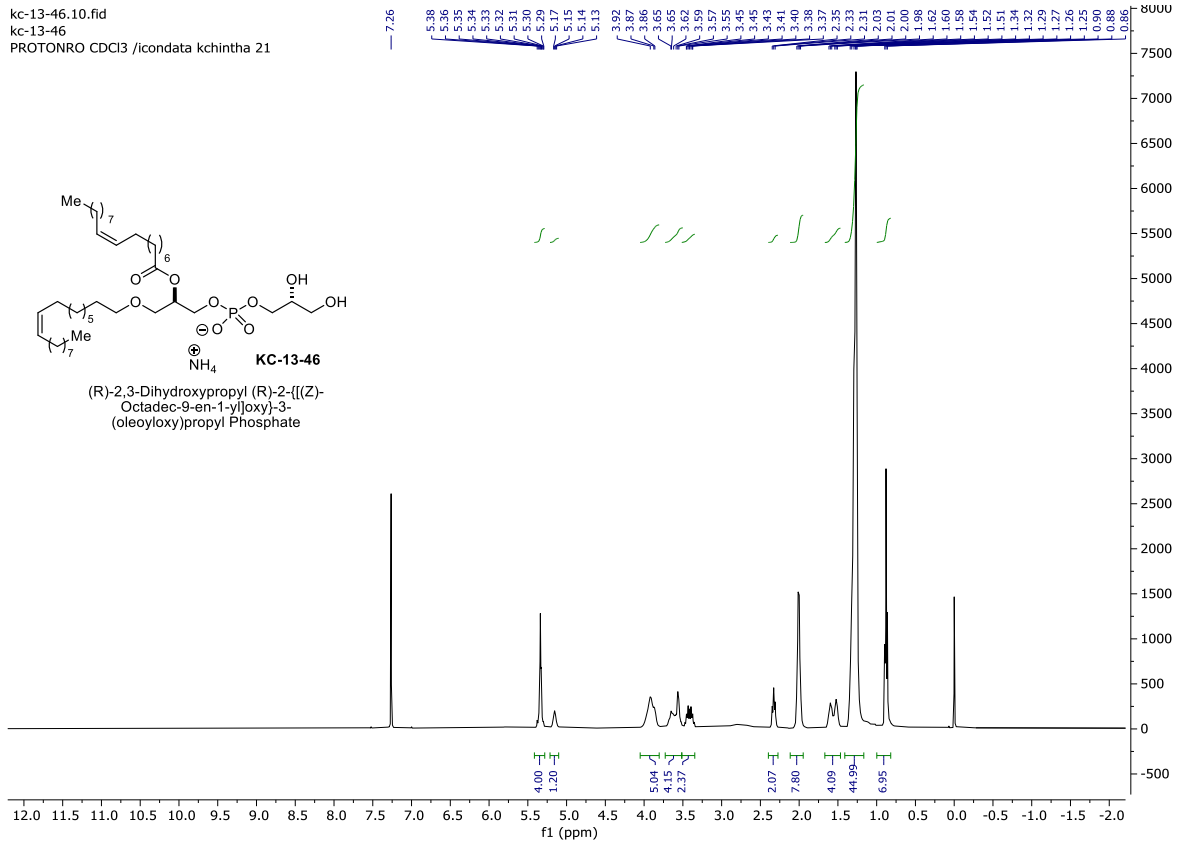

kc-13-46.20.fid  
kc-13-46  
C13CPD CDCl3 /icondata kchintha 21

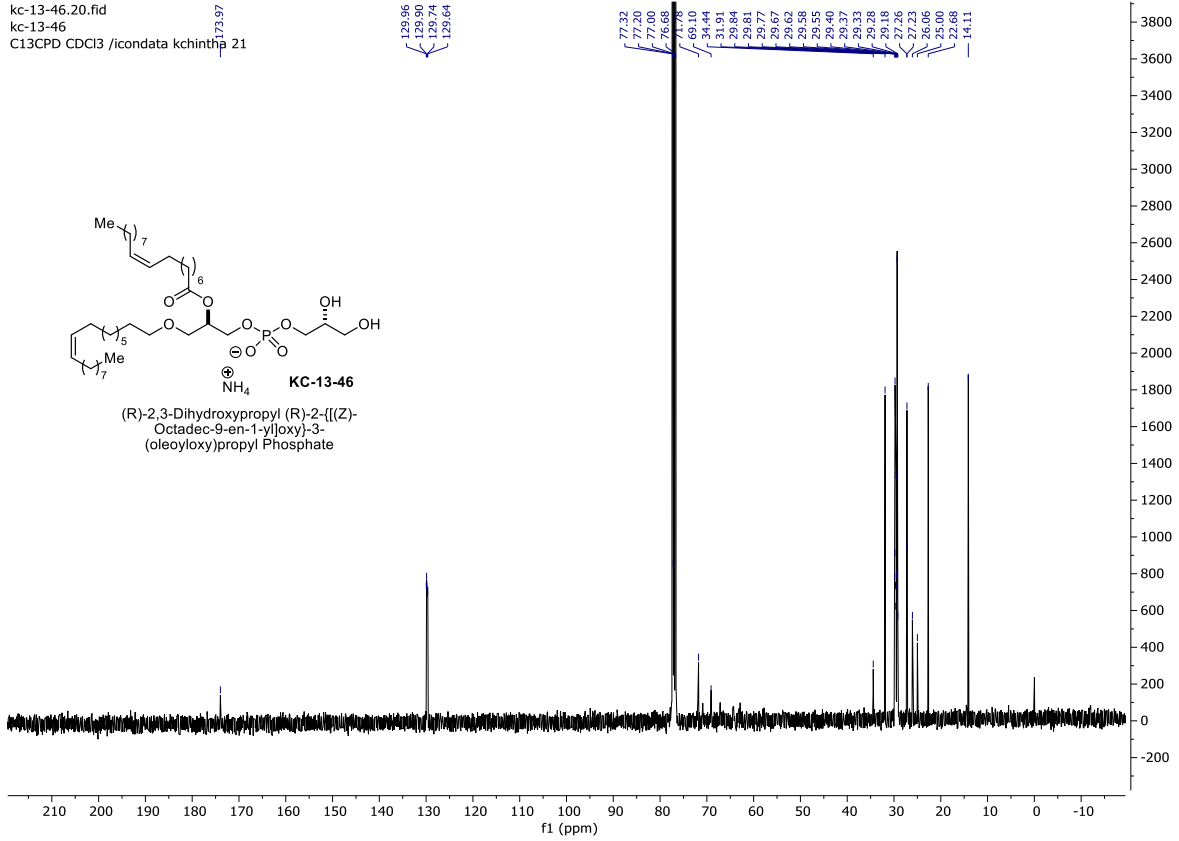

kc-13-46.11.fid  
kc-13-46  
P31CPD CDCl3 /icondata kchintha 21

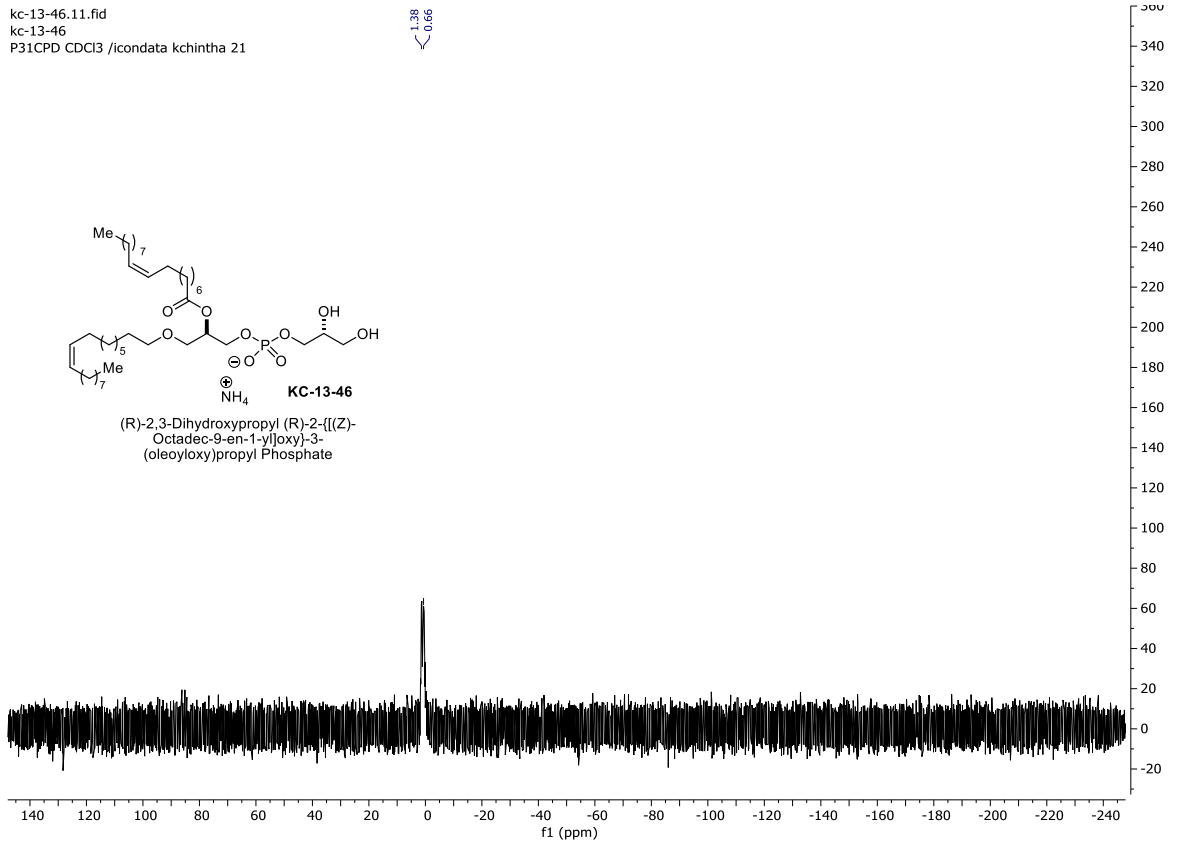

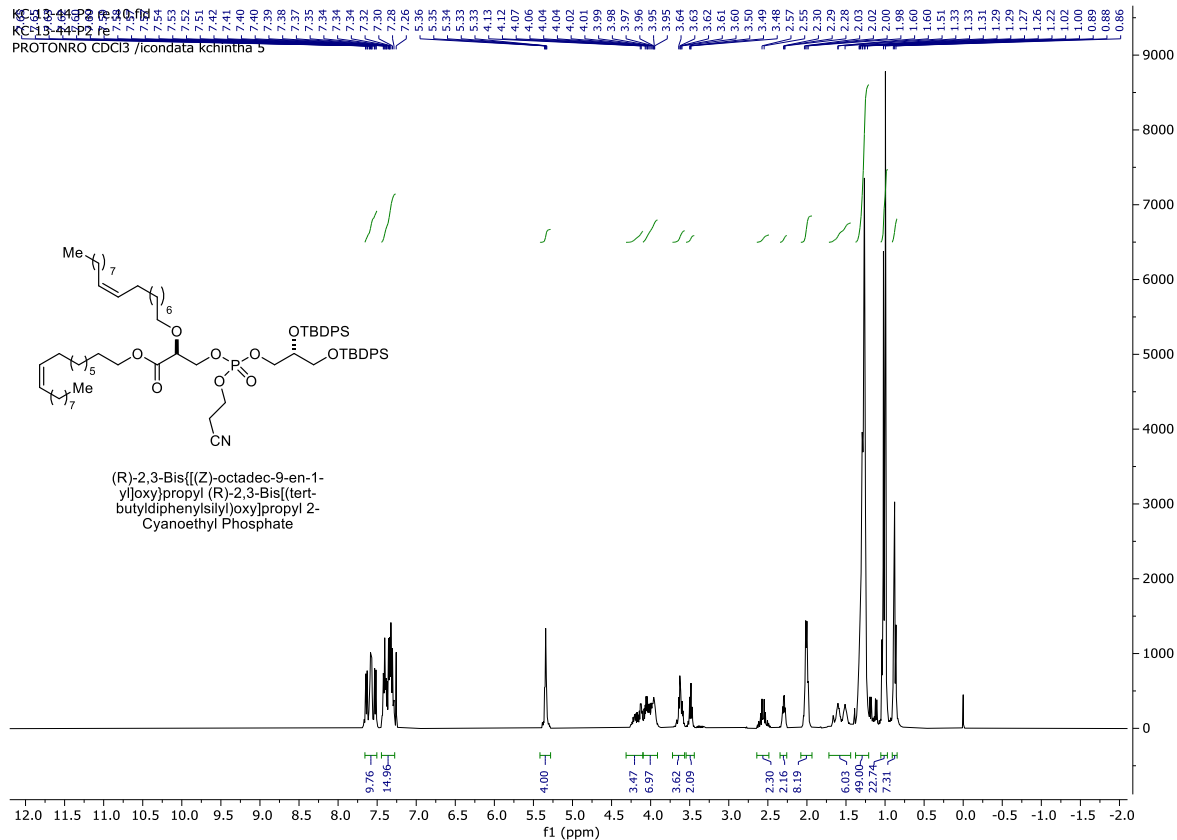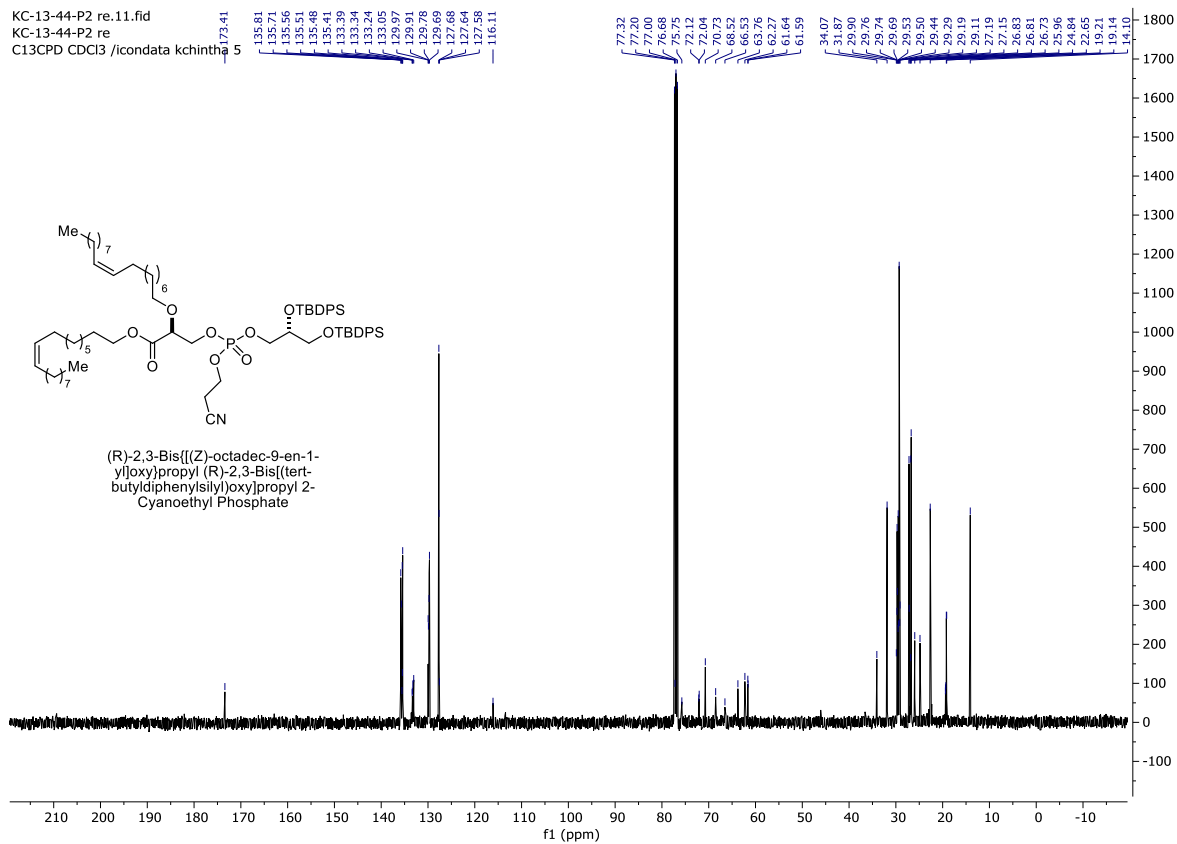



KC-13-44-P2 re.20.fid  
KC-13-44-P2 re  
P31CPD CDCl3 /icondata kchintha 5

-1.51

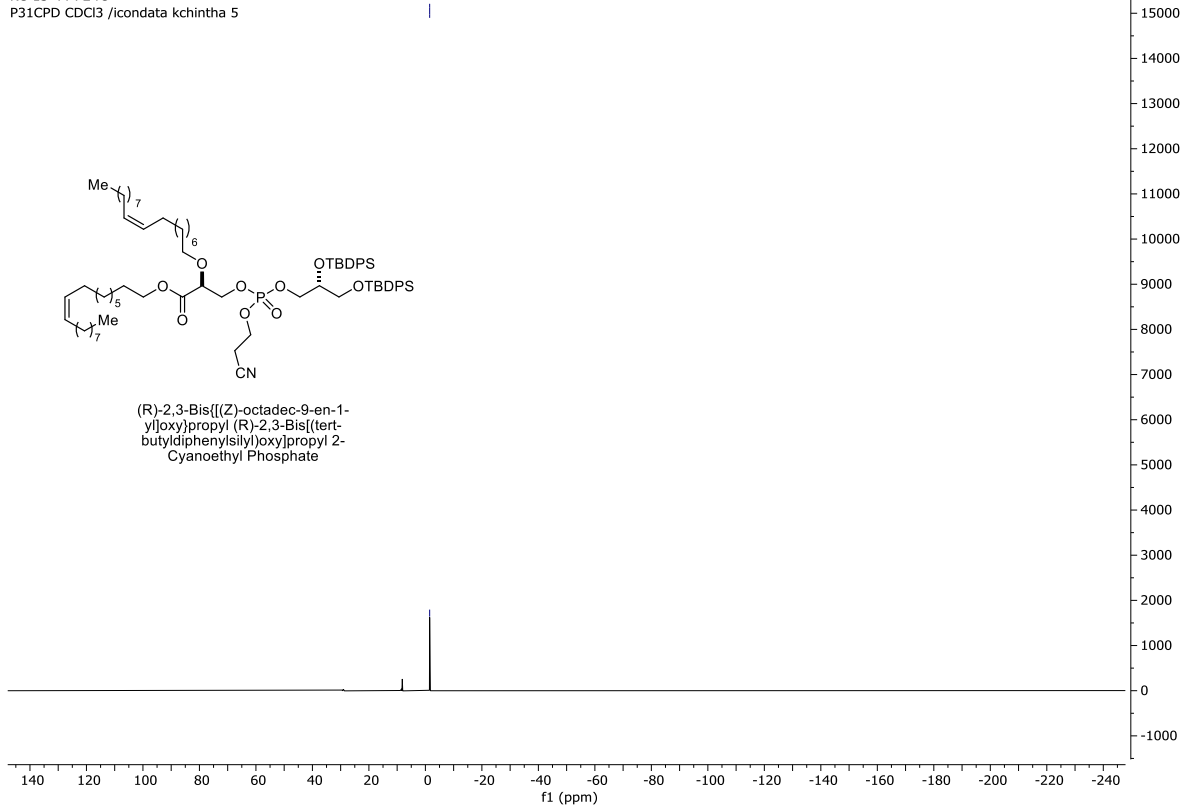

kc-13-47-2-P2.10.fid  
kc-13-47-2-P2  
PROTONRO CDCl3 /icondata kchintha 18

-7.26

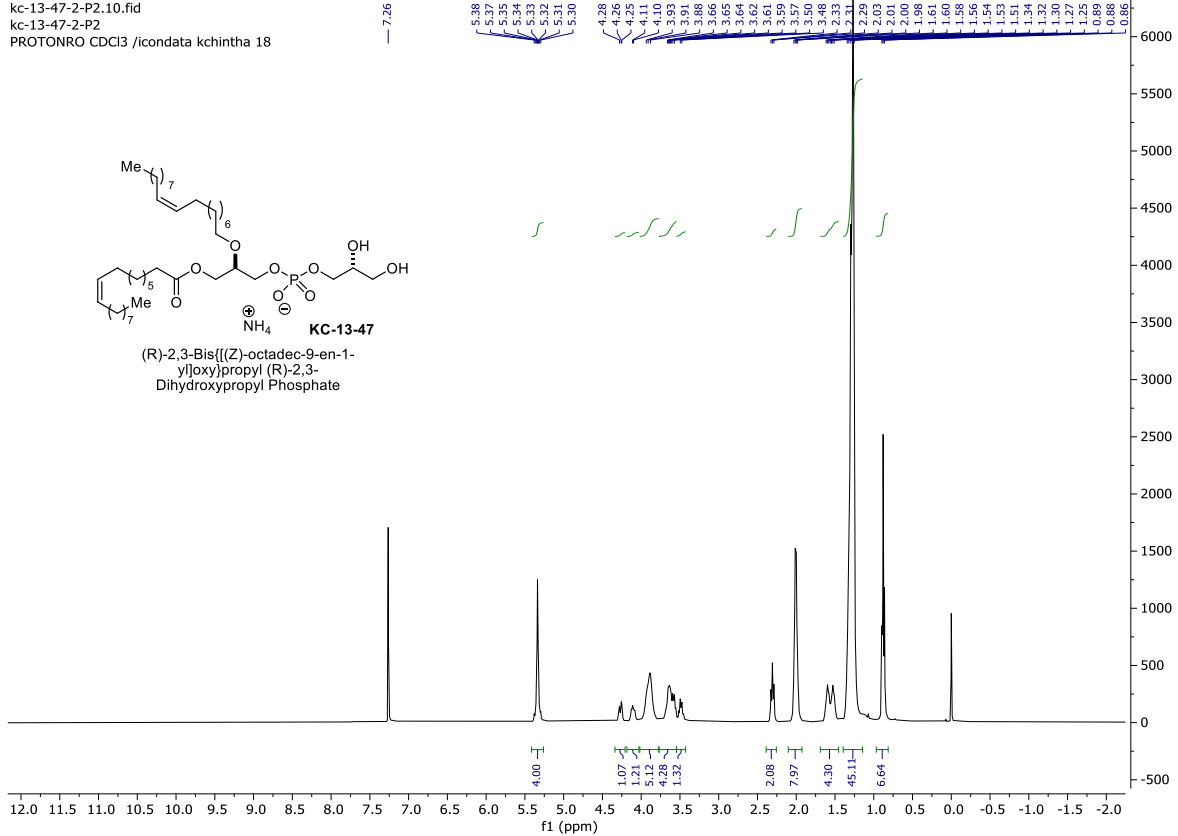

kc-13-47-2-P2.40.fid  
kc-13-47-2-P2  
C13CPD CDCl3 /icondata kchinthp 20

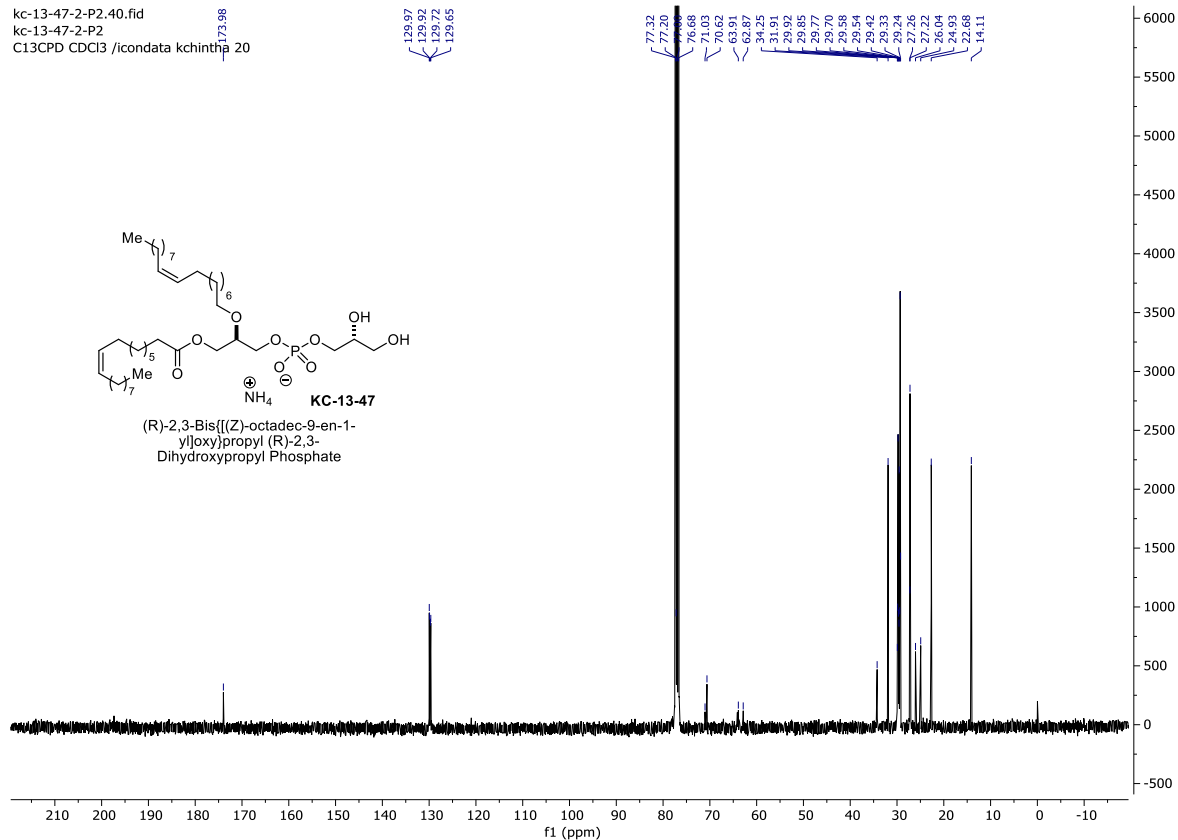

kc-13-47-2-P2.30.fid  
kc-13-47-2-P2  
P31CPD CDCl3 /icondata kchintha 18

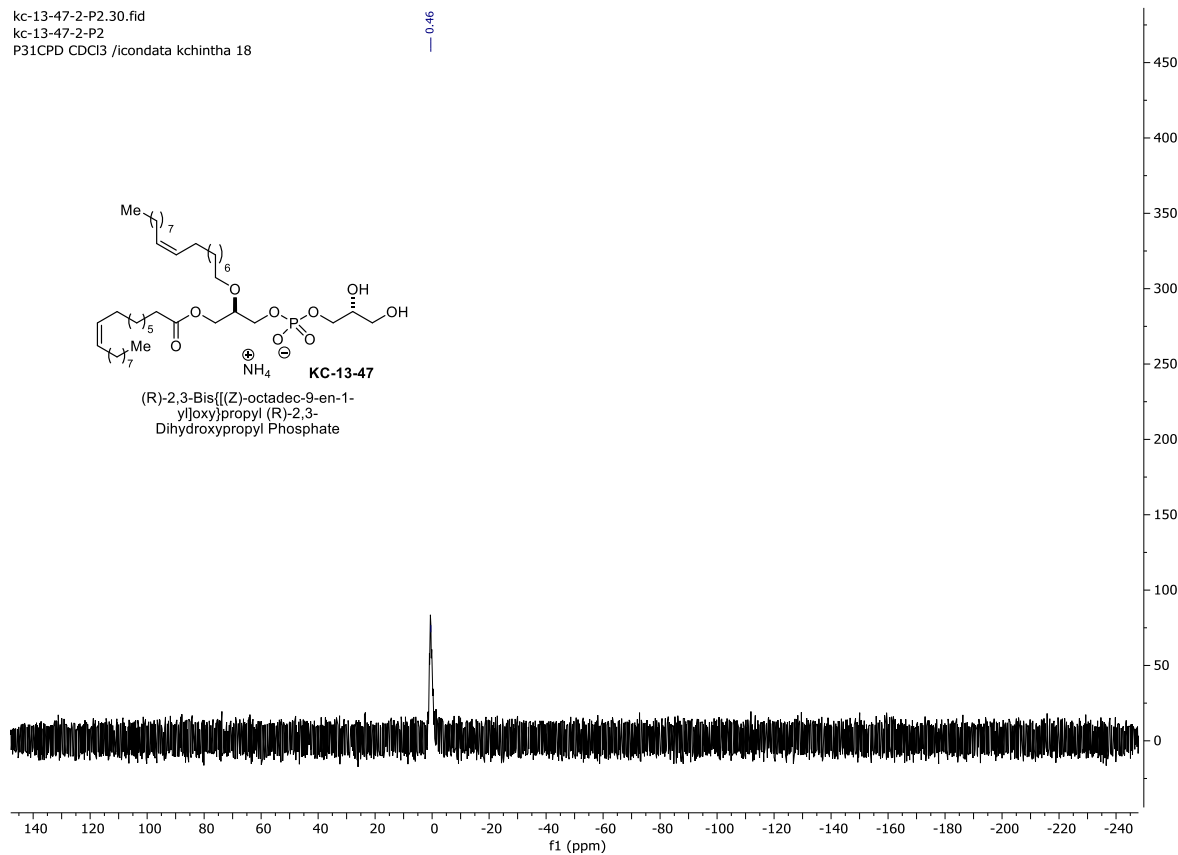

Supplement: mmc1.pdf [file mmc1.pdf]
